# Supplementary material for: Tumor Microenvironment-Responsive 6-Mercaptopurine-Releasing Injectable Hydrogel for Colon Cancer Treatment
Source: MDPI journal article supplement (doi:10.3390/gels9040319), 2023-04-10
Supplement: s1 [file s1]

Supplementary Materials

# Tumor Microenvironment-Responsive 6-Mercaptopurine-Releasing Injectable Hydrogel for Colon Cancer Treatment

Sungjun Kim, Wonjeong Lee, Heewon Park and Kyobum Kim \*

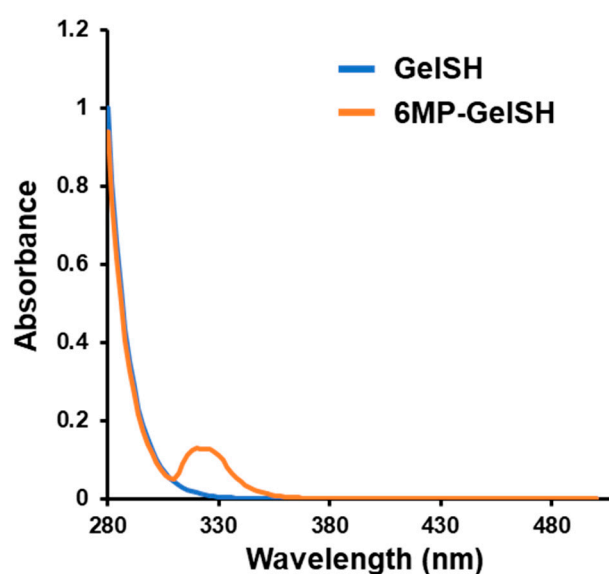

Figure S1. UV-spectra of GelSH and 6MP-GelSH.

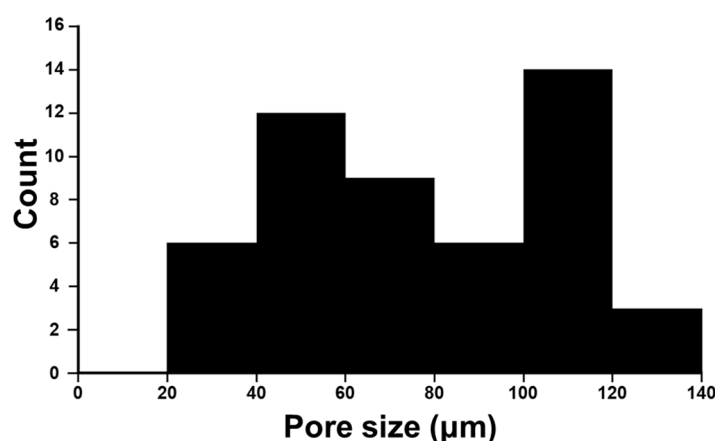

Figure S2. Pore size distribution of 6MP-GPGel. Pore size was obtained from SEM images.
